# Supplementary material for: A Novel C5a-neutralizing Mirror-image (l-)Aptamer Prevents Organ Failure and Improves Survival in Experimental Sepsis
Source: PubMed Central journal article supplement — Mol Ther. 2013 Aug 20;21(12):2236–46. doi: 10.1038/mt.2013.178 (PMC3863792; doi:10.1038/mt.2013.178), 2013-08-20
Supplement: mt2013178x1.pdf [file mt2013178x1.pdf]

# Supplementary Material

to

## A Novel C5a-neutralizing Mirror-image (L-)Aptamer Prevents Organ Failure and Improves Survival in Experimental Sepsis

Kai Hoehlig<sup>1</sup>, Christian Maasch<sup>1</sup>, Nelli Shushakova<sup>2</sup>, Klaus Buchner<sup>1</sup>, Markus Huber-Lang<sup>3</sup>, Werner G. Puschke<sup>1</sup>, Axel Vater<sup>1</sup>, and Sven Klussmann<sup>1</sup>

<sup>1</sup> NOXXON Pharma AG, Berlin, Germany, <sup>2</sup> Phenos GmbH, Hannover, Germany, <sup>3</sup> Department of Traumatology, Hand, Plastic, and Reconstructive Surgery, Center of Surgery, University of Ulm, Germany

Correspondence should be addressed to Kai Hoehlig, NOXXON Pharma AG, Max-Dohrn-Strasse 8-10, 10589 Berlin, Germany, tel. +49-30-726247-0, fax +49-30-726247-225, email [khoehlig@noxxon.com](mailto:khoehlig@noxxon.com).

Short title: C5a-neutralizing L-aptamer improves sepsis

**Figure S1.** Enrichment of bio-D-mC5a binding aptamers from a random RNA library.

**Figure S2.** C5a sequence alignment.

**Figure S3.** Reverse control Spiegelmers do not inhibit huC5a-induced chemotaxis.

**Figure S4.** NOX-D20 binds to mouse C5a.

**Figure S5.** NOX-D19 and NOX-D20 inhibit mouse C5a-induced chemotaxis.

**Table S1.** Sequences and frequencies of RNA aptamers identified after 10 rounds of in vitro selection.

**Table S2.** Truncation of NOX-D19001-6xDNA.

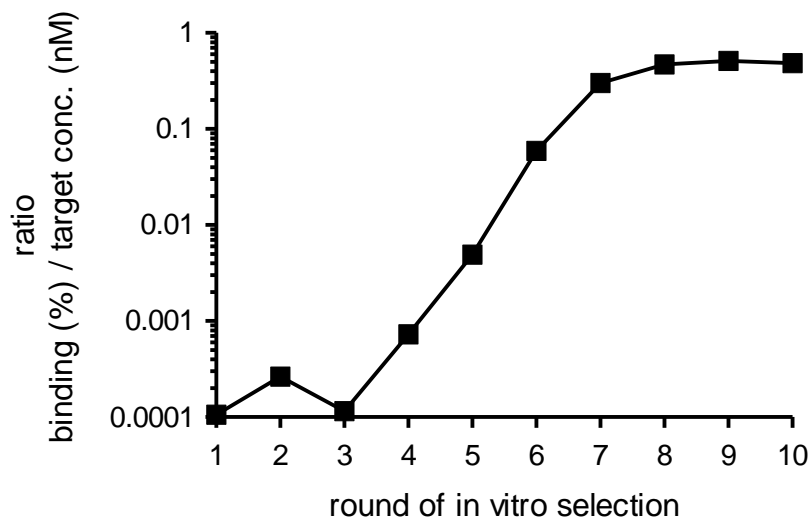

**Figure S1. Enrichment of bio-D-mC5a binding aptamers from a random RNA library.** The ratio of the percentage of target-bound aptamers and the concentration of target applied to the respective selection round was used as a measure for the frequency and affinity of target-binding aptamers in the library.

*Hoehlig K et al., A Novel C5a-neutralizing Mirror-image (L-)Aptamer Prevents Organ Failure and Improves Survival in Experimental Sepsis*

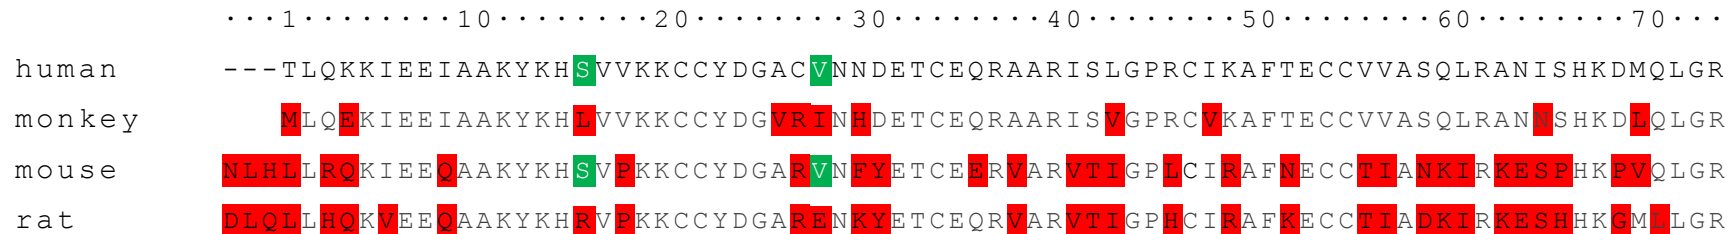

■ residues different from human C5a

■ residues shared by human and mouse C5a but different in monkey and rat C5a

**Figure S2. C5a sequence alignment.** Alignment of C5a protein sequences from human (UniProt ID: P01031), rhesus/cynomolgus monkey, mouse (UniProt ID: P06684), and rat (UniProt ID: P08650). Protein sequence of C5a from rhesus monkey was predicted from the genomic sequences (NCBI reference sequence: XP\_001095750.2). Identity of cynomolgus monkey C5a was confirmed by RT-PCR and sequencing.

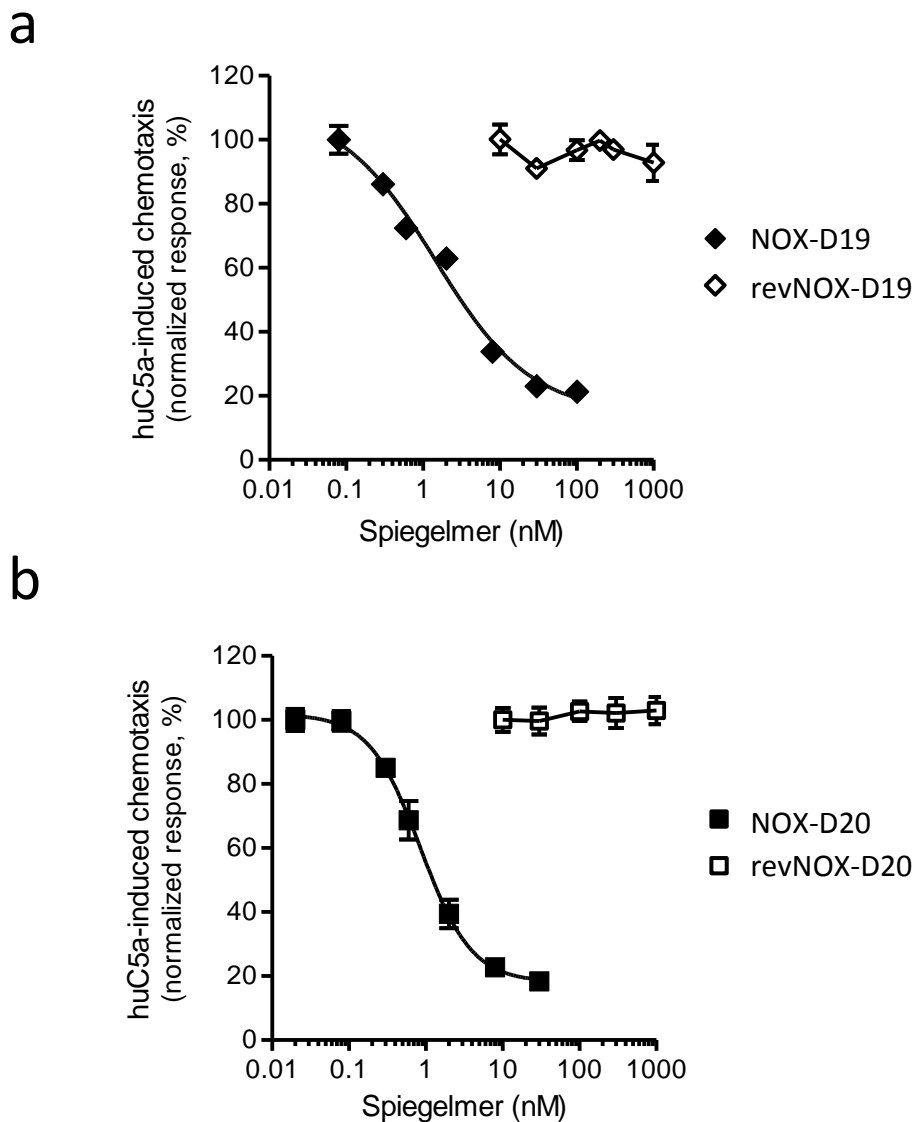

**Figure S3. Reverse control Spiegelmers do not inhibit huC5a-induced chemotaxis.** The oligonucleotide part of the PEGylated control Spiegelmers revNOX-D19 and revNOX-D20 is of the reverse sequence of NOX-D19 and NOX-D20, respectively. Chemotaxis of CD88<sup>+</sup> BA/F3 cell was stimulated with 0.1 nM human C5a pre-incubated with (a) NOX-D19 (closed diamonds), revNOX-D19 (open diamonds) and (b) NOX-D20 (closed squares), revNOX-D20 (open squares) at indicated concentrations. Mean  $\pm$  SD of triplicate measurement are shown. Data is representative for three independent experiments.

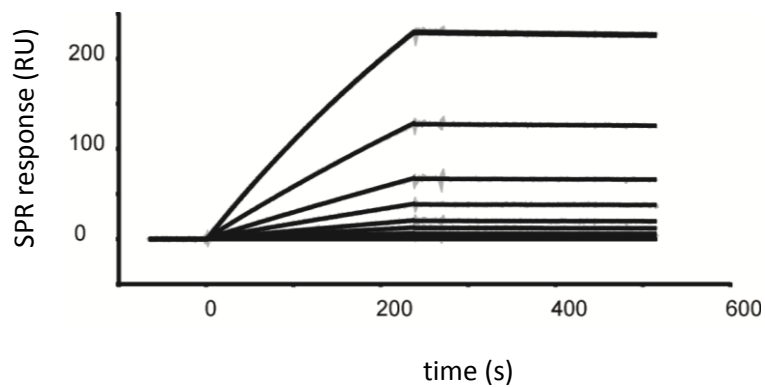

| $k_a$ ( $10^6 M^{-1} s^{-1}$ ) | $k_d$ ( $10^{-5} s^{-1}$ ) | $K_d (= k_d/k_a)$ |
|--------------------------------|----------------------------|-------------------|
| $2.44 \pm 0.001$               | $4.65 \pm 0.09$            | 19 pM             |

**Figure S4. NOX-D20 binds to mouse C5a.** SPR measurement of NOX-D20 binding to mouse C5a. Kinetic rate constants are shown as mean  $\pm$  SEM. Data is representative for at least 3 individual measurements.

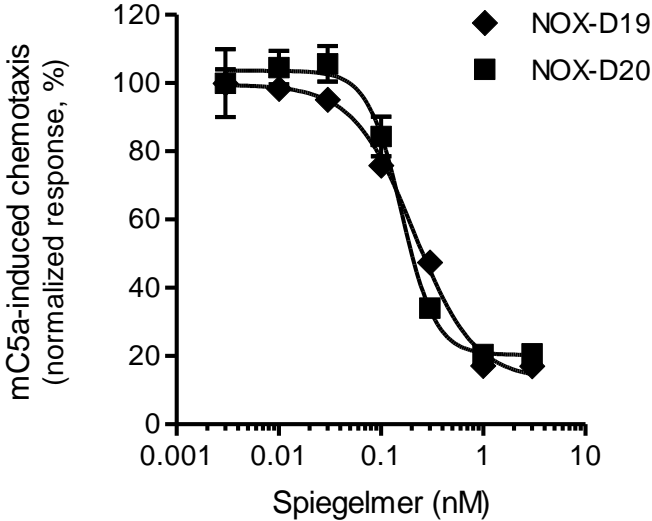

**Figure S5. NOX-D19 and NOX-D20 inhibit mouse C5a-induced chemotaxis.** Chemotaxis of CD88<sup>+</sup> BA/F3 cell was stimulated with 0.3 nM mouse C5a pre-incubated with NOX-D19 (closed diamonds) and NOX-D20 (black squares) at indicated concentrations. Stimulation with 0.3 nM mouse C5a stoichiometrically limits the sensitivity of the assay to IC<sub>50</sub> = 0.15 nM. Mean ± SD of triplicate measurement are shown. Data is representative for five independent experiments.

**Table S1.** Sequences and frequencies of RNA aptamers identified after 10 rounds of in vitro selection.

| name   | sequence <sup>a</sup> |    |    |    |    |    |    |    |    |   | frequency |   |   |   |   |   |   |   |   |   |   |   |   |   |   |   |   |   |   |   |   |   |   |   |   |   |   |   |   |   |   |   |   |   |   |   |   |   |   |   |   |   |   |   |   |   |   |   |   |       |       |       |       |       |        |        |
|--------|-----------------------|----|----|----|----|----|----|----|----|---|-----------|---|---|---|---|---|---|---|---|---|---|---|---|---|---|---|---|---|---|---|---|---|---|---|---|---|---|---|---|---|---|---|---|---|---|---|---|---|---|---|---|---|---|---|---|---|---|---|---|-------|-------|-------|-------|-------|--------|--------|
|        | 1                     | 10 | 20 | 30 | 40 | 50 | 60 | 70 | 80 |   |           |   |   |   |   |   |   |   |   |   |   |   |   |   |   |   |   |   |   |   |   |   |   |   |   |   |   |   |   |   |   |   |   |   |   |   |   |   |   |   |   |   |   |   |   |   |   |   |   |       |       |       |       |       |        |        |
| 274-D5 | g                     | g  | a  | g  | c  | u  | c  | a  | g  | a | c         | c | U | G | U | G | C | C | U | G | A | U | G | U | G | G | G | U | U | G | A | G | G | G | G | U | U | G | U | G | C | G | A | C | A | A | g | c | u | g | c | a | g | u | g | u | c | g | g | u     | c     | c     | a     | g     | 16.7 % |        |
| 274-H6 | g                     | g  | a  | g  | c  | u  | c  | a  | g  | a | c         | c | U | G | U | G | C | C | U | G | A | U | G | U | G | G | G | G | U | U | G | A | G | G | G | G | U | U | G | U | G | C | G | A | C | A | A | g | c | u | g | c | a | g | u | g | u | c | g | g     | u     | c     | c     | a     | g      | 16.7 % |
| 274-C8 | g                     | g  | a  | g  | c  | u  | c  | a  | g  | a | c         | c | U | A | U | G | C | C | U | G | A | U | G | U | G | U | G | A | A | G | G | U | U | U | G | G | G | U | U | G | U | C | G | A | C | A | A | g | c | u | g | c | a | g | u | g | u | c | g | g     | u     | c     | c     | a     | g      | 4.2 %  |
| 274-C5 | g                     | g  | a  | g  | c  | u  | c  | a  | g  | a | c         | c | U | G | U | G | C | C | U | G | A | U | G | U | G | G | U | G | A | G | G | G | U | U | G | U | G | C | G | A | C | A | A | g | c | u | g | c | a | g | u | g | u | c | g | g | u | c | c | a     | g     | 4.2 % |       |       |        |        |
| 274-B5 | g                     | g  | a  | g  | c  | u  | c  | a  | g  | a | c         | c | U | A | U | G | C | C | U | G | A | U | G | U | G | U | G | A | A | G | G | U | U | U | G | U | G | C | G | A | C | A | A | g | c | u | g | c | a | g | u | g | u | c | g | g | u | c | c | a     | g     | 4.2 % |       |       |        |        |
| 274-F5 | g                     | g  | a  | g  | c  | u  | c  | a  | g  | a | c         | c | U | G | U | G | C | C | U | G | A | U | G | U | G | A | U | G | U | A | G | G | G | U | U | G | U | G | C | G | A | C | A | A | g | c | u | g | c | a | g | u | g | u | c | g | g | u | c | c     | a     | g     | 4.2 % |       |        |        |
| 274-A5 | g                     | g  | a  | g  | c  | u  | c  | a  | g  | a | c         | c | U | G | U | G | C | C | U | G | A | U | G | U | G | U | A | G | G | G | G | U | U | G | U | G | C | G | A | C | A | A | g | c | u | g | c | a | g | u | g | u | c | g | g | u | c | c | a | g     | 4.2 % |       |       |       |        |        |
| 274-B6 | g                     | g  | a  | g  | c  | u  | c  | a  | g  | a | c         | c | U | G | U | G | C | C | U | G | A | U | G | U | G | A | U | G | U | A | G | G | G | U | U | U | G | U | G | C | G | A | C | A | A | g | c | u | g | c | a | g | u | g | u | c | g | g | u | c     | c     | a     | g     | 4.2 % |        |        |
| 274-G8 | g                     | g  | a  | g  | c  | u  | c  | a  | g  | a | c         | c | U | G | U | G | C | C | U | G | A | U | G | U | G | G | U | A | G | G | G | G | U | U | U | G | U | C | G | A | C | A | A | g | c | u | g | c | a | g | u | g | u | c | g | g | u | c | c | a     | g     | 4.2 % |       |       |        |        |
| 274-G7 | g                     | g  | a  | g  | c  | u  | c  | a  | g  | a | c         | c | U | G | U | G | C | C | U | U | G | U | G | G | U | G | A | G | G | G | G | U | U | U | G | U | C | G | A | C | A | A | g | c | u | g | c | a | g | u | g | u | c | g | g | u | c | c | a | g     | 4.2 % |       |       |       |        |        |
| 274-G6 | g                     | g  | a  | g  | c  | u  | c  | a  | g  | a | c         | c | U | G | U | G | C | C | U | G | A | U | G | U | G | G | A | U | G | G | G | G | U | U | U | G | U | C | G | A | C | A | A | g | c | u | g | c | a | g | u | g | u | c | g | g | u | c | c | a     | g     | 4.2 % |       |       |        |        |
| 274-H7 | g                     | g  | a  | g  | c  | u  | c  | a  | g  | a | c         | c | U | G | U | G | C | C | U | A | U | G | U | G | U | G | U | A | G | G | G | G | U | U | U | G | U | C | G | A | C | A | A | g | c | u | g | c | a | g | u | g | u | c | g | g | u | c | c | a     | g     | 4.2 % |       |       |        |        |
| 274-F6 | g                     | g  | a  | g  | c  | u  | c  | a  | g  | a | c         | c | U | G | U | G | C | C | U | A | U | G | U | G | U | A | G | G | G | G | U | U | U | G | U | C | G | A | C | A | A | g | c | u | g | c | a | g | u | g | u | c | g | g | u | c | c | a | g | 4.2 % |       |       |       |       |        |        |
| 274-H5 | g                     | g  | a  | g  | c  | u  | c  | a  | g  | a | c         | c | U | G | U | G | C | C | U | G | A | U | G | U | G | U | A | G | G | G | G | U | U | U | G | U | C | G | A | C | A | A | g | c | u | g | c | a | g | u | g | u | c | g | g | u | c | c | a | g     | 4.2 % |       |       |       |        |        |
| 274-F8 | g                     | g  | a  | g  | c  | u  | c  | a  | g  | a | c         | c | C | G | U | G | C | C | U | G | A | U | G | U | G | U | A | A | G | G | G | A | U | G | U | C | G | A | C | A | A | g | c | u | g | c | a | g | u | g | u | c | g | g | u | c | c | a | g | 4.2 % |       |       |       |       |        |        |
| 274-A6 | g                     | g  | a  | g  | c  | u  | c  | a  | g  | a | c         | c | U | A | U | G | C | C | U | G | A | U | G | U | G | G | U | A | G | G | G | G | U | U | U | G | U | C | G | A | C | A | A | g | c | u | g | c | a | g | u | g | u | c | g | g | u | c | c | a     | g     | 4.2 % |       |       |        |        |
| 274-C6 | g                     | g  | a  | g  | c  | u  | c  | a  | g  | a | c         | c | U | U | U | G | C | C | U | G | A | U | G | U | G | U | A | G | G | G | G | U | U | U | G | U | C | G | A | C | A | A | g | c | u | g | c | a | g | u | g | u | c | g | g | u | c | c | a | g     | 4.2 % |       |       |       |        |        |
| 274-D7 | g                     | g  | a  | g  | c  | u  | c  | a  | g  | a | c         | c | U | A | U | G | C | C | U | A | U | G | U | G | U | A | G | G | G | G | U | U | U | G | U | C | G | A | C | A | A | g | c | u | g | c | a | g | u | g | u | c | g | g | u | c | c | a | g | 4.2 % |       |       |       |       |        |        |

<sup>a</sup> Fixed primer-binding sites are in lower case. Point mutations are highlighted.

**Table S2.** Truncation of NOX-D19001-6xDNA.

| name                                        | sequence                                                                                 | length | affinity ( $K_d$ ) <sup>a</sup> |
|---------------------------------------------|------------------------------------------------------------------------------------------|--------|---------------------------------|
| NOX-D19001-6xDNA                            | <b>GCCUG</b> AUG (dU) GGUGGU (dG) (dA) AGGGUUGUUGGG (dU) G (dU) CGACGCA <b>(dC) AGGC</b> | 44 nt  | 0.4 nM                          |
| NOX-D19001-6xDNA-011                        | <b>GC-UG</b> AUG (dU) GGUGGU (dG) (dA) AGGGUUGUUGGG (dU) G (dU) CGACGCA <b>(dC) A-GC</b> | 42 nt  | 0.3 nM                          |
| NOX-D19001-6xDNA-018                        | <b>GCC-G</b> AUG (dU) GGUGGU (dG) (dA) AGGGUUGUUGGG (dU) G (dU) CGACGCA <b>(dC) -GGC</b> | 42 nt  | 0.3 nM                          |
| NOX-D19001-6xDNA-012                        | <b>G--UG</b> AUG (dU) GGUGGU (dG) (dA) AGGGUUGUUGGG (dU) G (dU) CGACGCA <b>(dC) A--C</b> | 40 nt  | 0.8 nM                          |
| NOX-D19001-6xDNA-020<br>= <b>NOX-D20001</b> | <b>G-C-G</b> AUG (dU) GGUGGU (dG) (dA) AGGGUUGUUGGG (dU) G (dU) CGACGCA <b>(dC) -G-C</b> | 40 nt  | 0.4 nM                          |
| NOX-D19001-6xDNA-033                        | <b>G---G</b> AUG (dU) GGUGGU (dG) (dA) AGGGUUGUUGGG (dU) G (dU) CGACGCA <b>(dC) ---C</b> | 38 nt  | 5.5 nM                          |

<sup>a</sup> Equilibrium dissociation constants ( $K_d$ ) for Spiegelmers binding to huC5a measured by SPR.
